# Supplementary material for: Chloroplast genomes in seven Lagerstroemia species provide new insights into molecular evolution of photosynthesis genes
Source: Front Genet. 2024 Apr 2;15:1378403. doi: 10.3389/fgene.2024.1378403 (PMC11019025; doi:10.3389/fgene.2024.1378403)
Supplement: Supplementary file 3 [file Table3.XLS]

AminoAcid	Symbol	Codon	Number	RSCU Value	Codon usage frequency(%)
*	Ter	TAA	48	1.6941	0.18
*	Ter	TAG	20	0.7059	0.07
*	Ter	TGA	17	0.6	0.06
A	Ala	GCA	392	1.108	1.45
A	Ala	GCC	234	0.6616	0.87
A	Ala	GCG	155	0.438	0.57
A	Ala	GCT	634	1.7924	2.34
C	Cys	TGC	82	0.5324	0.3
C	Cys	TGT	226	1.4676	0.84
D	Asp	GAC	227	0.404	0.84
D	Asp	GAT	897	1.596	3.32
E	Glu	GAA	1090	1.49	4.03
E	Glu	GAG	373	0.51	1.38
F	Phe	TTC	540	0.7114	2
F	Phe	TTT	978	1.2886	3.62
G	Gly	GGA	733	1.626	2.71
G	Gly	GGC	182	0.4036	0.67
G	Gly	GGG	310	0.6876	1.15
G	Gly	GGT	578	1.2824	2.14
H	His	CAC	154	0.4842	0.57
H	His	CAT	482	1.5158	1.78
I	Ile	ATA	739	0.9573	2.73
I	Ile	ATC	468	0.6063	1.73
I	Ile	ATT	1109	1.4364	4.1
K	Lys	AAA	1106	1.4846	4.09
K	Lys	AAG	384	0.5154	1.42
L	Leu	CTA	402	0.8418	1.49
L	Leu	CTC	194	0.4062	0.72
L	Leu	CTG	177	0.3708	0.65
L	Leu	CTT	603	1.263	2.23
L	Leu	TTA	909	1.9038	3.36
L	Leu	TTG	580	1.2144	2.14
M	Met	ATA	0	0	0
M	Met	ATC	0	0	0
M	Met	ATG	631	6.9776	2.33
M	Met	ATT	1	0.0112	0
M	Met	CTG	0	0	0
M	Met	GTG	1	0.0112	0
M	Met	TTG	0	0	0
N	Asn	AAC	301	0.456	1.11
N	Asn	AAT	1019	1.544	3.77
P	Pro	CCA	327	1.172	1.21
P	Pro	CCC	226	0.81	0.84
P	Pro	CCG	127	0.4552	0.47
P	Pro	CCT	436	1.5628	1.61
Q	Gln	CAA	719	1.5234	2.66
Q	Gln	CAG	225	0.4766	0.83
R	Arg	AGA	507	1.866	1.87
R	Arg	AGG	175	0.6444	0.65
R	Arg	CGA	380	1.3986	1.41
R	Arg	CGC	105	0.3864	0.39
R	Arg	CGG	115	0.4236	0.43
R	Arg	CGT	348	1.281	1.29
S	Ser	AGC	123	0.3552	0.45
S	Ser	AGT	418	1.2066	1.55
S	Ser	TCA	407	1.1748	1.51
S	Ser	TCC	335	0.9666	1.24
S	Ser	TCG	197	0.5688	0.73
S	Ser	TCT	599	1.7286	2.22
T	Thr	ACA	410	1.1988	1.52
T	Thr	ACC	261	0.7632	0.97
T	Thr	ACG	159	0.4648	0.59
T	Thr	ACT	538	1.5732	1.99
V	Val	GTA	534	1.47	1.97
V	Val	GTC	191	0.526	0.71
V	Val	GTG	186	0.512	0.69
V	Val	GTT	542	1.492	2
W	Trp	TGG	480	1	1.78
Y	Tyr	TAC	196	0.394	0.72
Y	Tyr	TAT	799	1.606	2.95
