# Supplementary material for: Chloroplast genomes in seven Lagerstroemia species provide new insights into molecular evolution of photosynthesis genes
Source: Front Genet. 2024 Apr 2;15:1378403. doi: 10.3389/fgene.2024.1378403 (PMC11019025; doi:10.3389/fgene.2024.1378403)
Supplement: Supplementary file 4 [file Table4.XLS]

Gene	MT019854	NC_034952	NC_042889	NC_042896	NC_060355	NC_071782
accD	NA	NA	0.270471	0	NA	NA
atpA	NA	NA	NA	NA	NA	NA
atpB	NA	NA	NA	NA	NA	NA
atpE	NA	NA	NA	NA	NA	NA
atpF	NA	NA	NA	NA	NA	NA
atpH	NA	0	NA	NA	0	NA
atpI	NA	NA	NA	NA	NA	NA
ccsA	NA	0.401138	NA	NA	NA	NA
cemA	0	0	0	NA	NA	NA
clpP	NA	NA	NA	NA	NA	NA
lhbA	NA	NA	na	na	NA	na
matK	0.173771	0.173771	0.173771	NA	NA	NA
ndhA	NA	0	0.243136	0	NA	NA
ndhB	NA	NA	NA	NA	NA	NA
ndhC	NA	NA	NA	NA	NA	NA
ndhD	0	0	0	0.225604	0	0
ndhE	0	0	0	NA	NA	NA
ndhF	0.37321	0.37321	0.298643	0.432709	0.297924	0.175783
ndhG	NA	NA	NA	NA	NA	NA
ndhH	NA	0	NA	NA	NA	0.283815
ndhI	0	0	0	NA	NA	NA
ndhJ	NA	NA	NA	NA	NA	NA
ndhK	NA	NA	NA	NA	NA	NA
petA	NA	NA	NA	NA	NA	NA
petB	0	0	0	NA	NA	NA
petD	0	0	1.15725	NA	NA	NA
petG	NA	NA	NA	NA	NA	NA
petL	NA	NA	NA	NA	NA	NA
petN	NA	NA	NA	NA	NA	NA
psaA	NA	NA	NA	NA	NA	NA
psaB	NA	NA	NA	NA	NA	NA
psaC	NA	NA	NA	NA	NA	NA
psaI	NA	NA	NA	NA	NA	NA
psaJ	NA	NA	NA	NA	NA	NA
psbA	NA	NA	0	NA	NA	NA
psbB	0	na	0	NA	NA	NA
psbC	0	0	0	NA	NA	NA
psbD	0	0	0	NA	NA	NA
psbE	NA	NA	NA	NA	NA	NA
psbF	0	0	0	NA	NA	NA
psbH	NA	NA	NA	NA	NA	NA
psbI	NA	NA	NA	NA	NA	NA
psbJ	NA	NA	NA	NA	NA	NA
psbK	NA	NA	NA	NA	NA	NA
psbL	NA	NA	NA	NA	NA	NA
psbM	NA	NA	NA	NA	NA	NA
psbN	NA	NA	NA	NA	NA	NA
psbT	NA	NA	NA	NA	NA	NA
rbcL	1.59332	0.720978	0.720978	NA	NA	NA
rpl14	NA	NA	NA	NA	NA	NA
rpl16	NA	NA	NA	NA	NA	NA
rpl2	NA	NA	NA	NA	NA	NA
rpl20	NA	NA	NA	NA	NA	NA
rpl22	NA	NA	NA	NA	NA	NA
rpl23	NA	NA	NA	NA	NA	NA
rpl32	NA	NA	NA	NA	NA	NA
rpl33	0	0	0	0	0	0
rpl36	NA	NA	NA	NA	NA	NA
rpoA	NA	NA	NA	NA	NA	NA
rpoB	0	0	0.110932	NA	NA	NA
rpoC1	0.143549	0.143549	0.143549	NA	NA	NA
rpoC2	0.381356	0.494825	0.426709	NA	NA	NA
rps11	NA	NA	NA	NA	NA	NA
rps12	NA	NA	NA	NA	NA	NA
rps14	NA	NA	NA	NA	NA	NA
rps15	NA	NA	NA	NA	NA	NA
rps16	0	0	0.226416	NA	NA	NA
rps18	NA	NA	NA	NA	NA	0
rps19	0	NA	NA	NA	NA	NA
rps2	NA	NA	NA	NA	NA	NA
rps3	NA	NA	NA	NA	NA	NA
rps4	NA	NA	NA	NA	NA	NA
rps7	NA	NA	NA	NA	NA	NA
rps8	NA	NA	NA	NA	NA	NA
ycf1	0.713659	0.627141	0.453076	NA	NA	NA
ycf2	0.099963	NA	NA	NA	NA	NA
ycf3	NA	0	0.201573	0.201573	NA	0.201573
ycf4	NA	NA	NA	NA	NA	NA
